# Supplementary material
Source: publisher figshare collection journal article supplement (https://karger.figshare.com/ndownloader/files/25291943)
Supplement: Supplementary file 1 [file 25291943]

**Appendix**

Algebraic details of the mathematical model for lead-time calculation.

Similarly to other cancers, exponential tumor growth during the sojourn time was assumed [18].

Sojourn time can be considered as the duration of a disease before clinical symptoms become apparent but during which the disease can be detected by a screening test [17,18]. Consequently, intrahepatic cholangiocarcinoma (ICC)can be expressed as:

1. V(t) = Voe rt

where Vo is the tumor volume at time t=0, e is the exponential constant, t is time and r is the tumor growth rate. The sojourn time (ts) is defined as the time that it takes a tumor to grow from the size at which an individual ICC will become detectable by surveillance (Sm) to the size at which an individual ICC will become detectable in the absence of surveillance (Sp) [19]:

1. ts = [ln(Vp / Vm)] / r

where Vp (tumor volume detected by surveillance) and Vm (tumor volume in the absence of surveillance) are relative volumes assuming that tumors, having a diameter of Sm or Sp, are spherical by applying the appropriate mathematical formula. Calculation of the sojourn time requires the tumor growth rate to be known, and this variable can be derived from the tumor doubling time (td) as follows [15,19]:

1. r = ln(2) / td

The reciprocal of the sojourn 1/ts describes the rate of transition to symptomatic disease (λ); this latter information allows the final calculation of the lead time by solving the following equation:

1. E(s) = (1-eλt) / λ

The correction for lead time would involve subtracting E(s) from the observed survival time, or time to the last live follow-up, of patients with ICC detected during surveillance. Calculation of the sojourn time requires the tumor growth rate to be known, and this variable was derived from the tumor volume doubling time (DT) (equation 3). Thus, the basis of lead-time estimation relies on the doubling time. Hence, to obtain the most suitable DT values, a systematic review of the literature was carried out. ]. To assess the doubling time of ICC, we searched the Medline database from January 2000 to August 2019 with the keywords or Medical Subject Headings (MeSH) “cholangiocarcinoma” AND “doubling time” AND/OR “growth rate”. All the studies were limited to humans and literature in English.. A manual search of the references cited in the original articles was also carried out. The literature research identified a single pertinent paper [14], in which the median doubling time of ICC was 70 days.

Notably, lead time calculated with this formula is never greater than survival; therefore, the correction never gives negative survival times.
